# Supplementary material for: Association of Medicaid Expansion in Arkansas With Postpartum Coverage, Outpatient Care, and Racial Disparities
Source: PubMed Central journal article supplement (PMC8796925; doi:10.1001/jamahealthforum.2021.4167), 2021-12-17
Supplement: jamahealthforum-e214167-s001.pdf [file jamahealthforum-e214167-s001.pdf]

## Supplemental Online Content

Steenland MW, Wilson IB, Matteson KA, Trivedi AN. Association of Medicaid expansion in Arkansas with postpartum coverage, outpatient care, and racial disparities. *JAMA Health Forum*. 2021;2(12):e214167. doi:10.1001/jamahealthforum.2021.4167

**eFigure 1.** Sample inclusion flow-chart

**eTable 1.** Characteristics of persons giving birth in Arkansas from 2013 to 2015, by whether the birth matched to an enrollment record in the Arkansas All-Payer Claims Database at the time of birth

**eTable 2.** Changes in the characteristics of persons with Medicaid and commercially paid childbirth associated with Medicaid expansion, 2013-2015

**eAppendix.** Tests for parallel pre trends and robustness checks

**eTable 3.** Pre-period monthly trend Differences between persons with Medicaid and commercial coverage during childbirth

**eTable 4.** Results from interrupted time series regression among persons with Medicaid coverage, 2013-2015

**eFigure 2.** Mean number of non-ED outpatient visits in the first 60 days postpartum visits among persons with Medicaid and commercially financed childbirth, 2013-2015

**eFigure 3.** Mean number of outpatient visits during the first six months postpartum among persons with Medicaid and commercially financed childbirth, 2013-2015

**eFigure 4.** Proportion of persons with Medicaid-covered childbirth who had six months of continuous insurance coverage after childbirth, by race/ethnicity, 2013-2015

**eFigure 5.** Mean number of non-ED outpatient visits during the first 6 months postpartum among persons with Medicaid financed childbirth, by race/ethnicity, 2013-2015

**eTable 5.** Racial disparities in continuous enrollment and number of outpatient visits during the first 6 months postpartum, 2013-2015

**eReference**

This supplemental material has been provided by the authors to give readers additional information about their work.

**Study population:**

Twenty six percent of births to insured adult Arkansas residents did not match to an enrollment record because they were covered in self-insured plans, which are not required to submit data to the APCD, or due to limitations of matching birth certificates to enrollment based on name and date of birth (i.e., name changes and typographical errors).

eFigure 1: Sample inclusion flow-chart

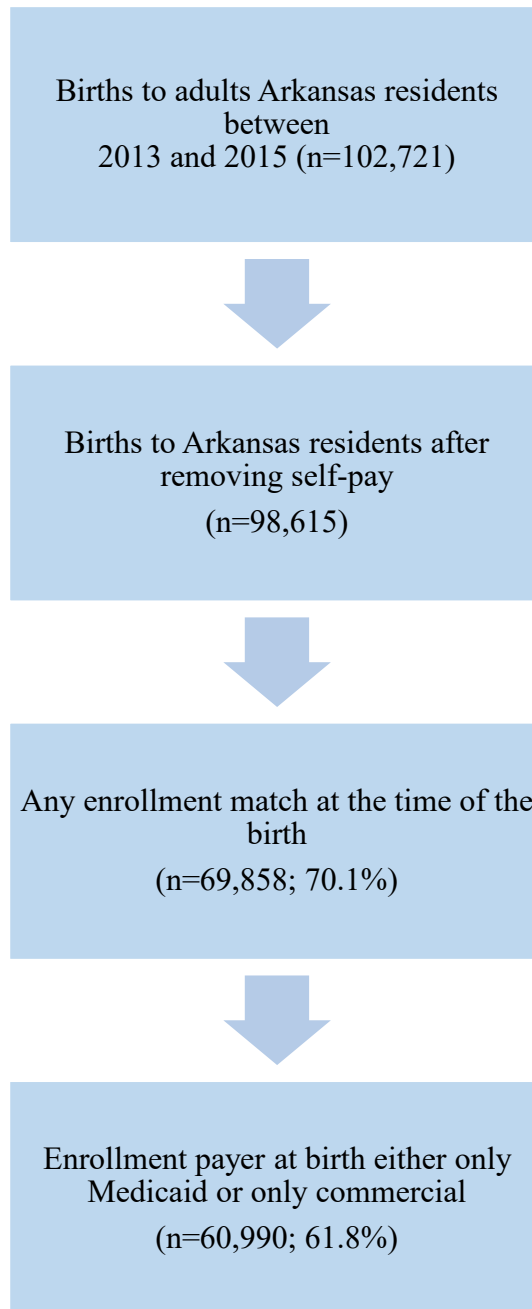

eTable 1: Characteristics of persons giving birth in Arkansas from 2013 to 2015, by whether the birth matched to an enrollment record in the Arkansas All-Payer Claims Database at the time of birth

| Variable                           | Matched<br>(n=60,990) | Unmatched<br>(n=37,599) |
|------------------------------------|-----------------------|-------------------------|
|                                    | Percent (95% CI)      | Percent (95% CI)        |
| Mean age in years                  | 26.6 (26.6, 26.7)     | 27.7 (27.6, 27.7)       |
| Age 19-24                          | 40.4 (40.0, 40.8)     | 32.5 (32.0, 32.9)       |
| Age 25-30                          | 36.1 (35.7, 36.5)     | 38.1 (37.6, 38.6)       |
| Age 31-35                          | 14.7 (14.4, 14.9)     | 17.8 (17.5, 18.2)       |
| Age 36-50                          | 8.8 (8.6, 9.1)        | 11.6 (11.3, 11.9)       |
| Hispanic                           | 8.6 (8.4, 8.8)        | 11.9 (11.6, 12.2)       |
| Non-Hispanic black                 | 21.8 (21.5, 22.2)     | 12.4 (12.1, 12.8)       |
| Non-Hispanic white                 | 65.8 (65.5, 66.2)     | 70.4 (69.9, 70.8)       |
| Hispanic                           | 8.6 (8.4, 8.8)        | 11.9 (11.6, 12.2)       |
| Non-Hispanic other or unknown race | 3.7 (3.5, 3.8)        | 5.3 (5.1, 5.5)          |
| Less than college                  | 80.6 (80.2, 80.9)     | 71.8 (71.3, 72.2)       |
| College or greater                 | 19.4 (19.1, 19.8)     | 28.2 (27.8, 28.7)       |
| Cesarean birth                     | 26.6 (26.6, 26.7)     | 27.7 (27.6, 27.7)       |

Authors' analysis of the Arkansas All Payer Claims Database, 2013–15. Table includes only adults (19 year or older) who were residents of Arkansas at the time of birth.

eTable 2: Changes in the characteristics of persons with Medicaid and commercially paid childbirth associated with Medicaid expansion, 2013-2015

|              | Medicaid<br>January-June<br>2013 | Medicaid<br>2014<br>and after | Medicaid<br>Difference           | Unadjusted<br>difference<br>between<br>pre-and<br>post-<br>expansion | Commercial<br>January-June<br>2013 | Commercial<br>2014<br>and after | Commercial<br>Difference         | Unadjusted<br>difference<br>between<br>pre-and<br>post-<br>expansion | Difference-in-<br>Differences    |         |
|--------------|----------------------------------|-------------------------------|----------------------------------|----------------------------------------------------------------------|------------------------------------|---------------------------------|----------------------------------|----------------------------------------------------------------------|----------------------------------|---------|
|              | Percent<br>(95% CI)              | Percent<br>(95% CI)           | Percentage<br>Points<br>(95% CI) | p-value                                                              | Percent<br>(95% CI)                | Percent<br>(95% CI)             | Percentage<br>Points<br>(95% CI) | p-value                                                              | Percentage<br>Points<br>(95% CI) | p-value |
| Age          | 25.3<br>(25.2, 25.4)             | 25.6<br>(25.6, 25.7)          | 0.3<br>(0.2, 0.5)                | 0.000                                                                | 29.3<br>(29.2, 29.5)               | 29.6<br>(29.5, 29.6)            | 0.2<br>(0.0, 0.4)                | 0.034                                                                | 0.1<br>(-0.1, 0.3)               | 0.373   |
| Hispanic     | 12.2<br>(11.5, 13.0)             | 10.1<br>(9.8, 10.4)           | -2.1<br>(-2.9, -1.3)             | 0.000                                                                | 3.0<br>(2.3, 3.6)                  | 3.1<br>(2.8, 3.4)               | 0.1<br>(-0.6, 0.8)               | 0.785                                                                | -2.0***<br>(-3.1, -1.0)          | 0.000   |
| Black        | 27.6<br>(26.5, 28.6)             | 26.8<br>(26.3, 27.3)          | -0.7<br>(-1.9, 0.4)              | 0.213                                                                | 7.1<br>(6.1, 8.1)                  | 6.8<br>(6.3, 7.3)               | -0.3<br>(-1.4, 0.8)              | 0.574                                                                | -0.5<br>(-2.0, 0.9)              | 0.477   |
| White        | 56.8<br>(55.6, 58.0)             | 59.2 (58.7,<br>59.8)          | 2.5<br>(1.2, 3.7)                | 0.000                                                                | 86.0<br>(84.7, 87.3)               | 86.2<br>(85.5, 86.8)            | 0.2<br>(-1.2, 1.6)               | 0.787                                                                | 2.1*<br>(0.3, 3.9)               | 0.024   |
| Total births | 1,145<br>(1,144, 1,146)          | 1,214<br>(1,213, 1,215)       | 69<br>(66, 72)                   | 0.000                                                                | 455<br>(454, 456)                  | 485<br>(484, 485)               | 29<br>(28, 31)                   | 0.000                                                                | 0.03<br>(-0.06, 0.12)            | 0.485   |

SOURCE Authors' analysis of the Arkansas All Payer Claims Database, 2013–15. NOTES Difference-in-differences regression models adjusted for age, education, race and county of residence. Standard errors clustered at the individual level. \*p < 0.05 \*\*p < 0.01 \*\*\*p < 0.001

## eAppendix. Tests for parallel pre trends and robustness checks

We tested for differential trends in continuous postpartum coverage and number of visits in the first six months postpartum by childbirth payer. We fail to reject the null that the trends in 6-month continuous coverage and mean visits during the first 60 days postpartum were parallel. However, we find evidence of non-parallel pre-trends for the number of visits between 61 days and 6 months postpartum ( $\beta=-0.1$ , 95% CI: [-0.1, -0.0]), and for total visits within the first six months postpartum ( $\beta=-0.1$ , 95% CI: [-0.1, -0.0]).

However, we do not believe that the finding of non-parallel trends for two of the study outcomes is a likely cause of bias in this study. While tests of parallel trends are common in published difference-in-differences literature, recent methodologic studies have pointed out that while parallel pre-trends provides suggestive evidence of counterfactual parallel trends, it is neither necessary nor sufficient for the parallel counterfactual trends assumption to hold.<sup>1</sup>

As our study includes only six months of fully pre-policy data, we have limited information on which to conduct baseline tests for parallel pre-trends. Due to the limited number of pre-policy months, and the high variance of the trend for visits among persons with commercially paid childbirth, we find implausibly large estimates for the pre-trend in this group that is not robust to inclusion of subsequent months in the study period. The pre-policy trend for postpartum visits between days 61 months and 6 years and the full six months postpartum among persons with a commercially paid birth was a 0.1 visit increase per month (95% CI 0.0, 0.1). Extrapolating this trend to the end of the study would have resulted in an increase of 3.5 visits for both outcomes, or almost a 300% increase from baseline for visits between 61 days and six months postpartum and a 220% increase from baseline for visits during the full six months postpartum. Further, extending months included in the analysis to include the transition period completely eliminated this increasing trend and difference in the pre-trends. These findings suggest that six months of pre-policy data is not sufficient to reliably identify pre-policy trends among commercially paid births.

eTable 3: Pre-period monthly trend Differences between persons with Medicaid and commercial coverage during childbirth

|                           | Continuous 6-month Postpartum enrollment | Visits in the first 60 days postpartum | Visits between 61 days and 6 months postpartum | Visits during the Full six months postpartum |
|---------------------------|------------------------------------------|----------------------------------------|------------------------------------------------|----------------------------------------------|
| January – June 2013       | Coefficient (95% CI)                     | Coefficient (95% CI)                   | Coefficient (95% CI)                           | Coefficient (95% CI)                         |
| Medicaid-paid birth       | -39.3***<br>(-43.1, -35.4)               | -0.5***<br>(-0.7, -0.4)                | -0.8***<br>(-1.0, -0.6)                        | -0.7***<br>(-0.9, -0.5)                      |
| Trend                     | 0.4<br>(-0.4, 1.2)                       | 0.0<br>(-0.0, 0.1)                     | 0.1*<br>(0.0, 0.1)                             | 0.0*<br>(0.0, 0.1)                           |
| Medicaid-paid birth*trend | -0.2<br>(-1.1, 0.7)                      | -0.0*<br>(-0.1, -0.0)                  | -0.1***<br>(-0.1, -0.0)                        | -0.1***<br>(-0.1, -0.0)                      |
| Constant                  | 97.7***<br>(87.7, 107.6)                 | 0.1<br>(-0.6, 0.8)                     | 0.7**<br>(0.2, 1.3)                            | 1.1***<br>(0.6, 1.7)                         |
| All months 2013           |                                          |                                        |                                                |                                              |
| Medicaid-paid birth       | -38.0***<br>(-40.5, -35.5)               | -0.6***<br>(-0.7, -0.4)                | -1.2***<br>(-1.5, -1.0)                        | -1.8***<br>(-2.1, -1.5)                      |
| Trend                     | 0.7***<br>(0.4, 1.0)                     | -0.0<br>(-0.0, 0.0)                    | 0.0<br>(-0.0, 0.0)                             | 0.0<br>(-0.0, 0.0)                           |
| Medicaid-paid birth*trend | -1.1***<br>(-1.4, -0.8)                  | -0.0<br>(-0.0, 0.0)                    | 0.0<br>(-0.0, 0.0)                             | 0.0<br>(-0.0, 0.1)                           |
| Constant                  | 86.6***<br>(79.3, 93.8)                  | 1.1***<br>(0.8, 1.4)                   | 1.8***<br>(1.3, 2.3)                           | 2.9***<br>(2.3, 3.6)                         |

\*p < 0.05 \*\*p < 0.01 \*\*\*p < 0.001

eTable 4: Results from interrupted time series regression among persons with Medicaid coverage, 2013-2015

|                                                    | Continuous enrollment      | Full six months postpartum | Days 1 through 60        | Day 61 and 6 months      |
|----------------------------------------------------|----------------------------|----------------------------|--------------------------|--------------------------|
|                                                    | Percentage Points (95% CI) | Number (95% CI)            | Number (95% CI)          | Number (95% CI)          |
| <b>All birthing persons</b>                        |                            |                            |                          |                          |
| Quarterly trend before Medicaid expansion          | 1.95***<br>(1.28, 2.61)    | -0.02<br>(-0.06, 0.02)     | -0.01<br>(-0.02, 0.01)   | -0.02<br>(-0.05, 0.01)   |
| Level change immediately after Medicaid expansion  | -10.90*<br>(-21.35, -0.46) | 0.03<br>(-0.39, 0.45)      | -0.04<br>(-0.17, 0.09)   | 0.07<br>(-0.29, 0.44)    |
| Change in quarterly trend after Medicaid expansion | 7.09***<br>(5.29, 8.89)    | 0.15**<br>(0.07, 0.24)     | 0.06***<br>(0.04, 0.08)  | 0.09*<br>(0.02, 0.17)    |
| <b>Non-Hispanic Black birthing persons</b>         |                            |                            |                          |                          |
| Quarterly trend before Medicaid expansion          | 1.38*<br>(0.36, 2.40)      | -0.02<br>(-0.08, 0.03)     | -0.01<br>(-0.02, 0.00)   | -0.02<br>(-0.04, 0.00)   |
| Level change immediately after Medicaid expansion  | -8.74<br>(-20.28, 2.81)    | 0.16<br>(-0.24, 0.57)      | -0.01<br>(-0.09, 0.06)   | 0.18<br>(-0.19, 0.54)    |
| Change in quarterly trend after Medicaid expansion | 8.04***<br>(6.61, 9.46)    | 0.21***<br>(0.13, 0.29)    | 0.08***<br>(0.06, 0.09)  | 0.14***<br>(0.08, 0.19)  |
| <b>Non-Hispanic white birthing persons</b>         |                            |                            |                          |                          |
| Quarterly trend before Medicaid expansion          | 1.52<br>(-0.57, 3.61)      | -0.09*<br>(-0.17, -0.01)   | -0.03<br>(-0.06, 0.00)   | -0.06<br>(-0.12, 0.00)   |
| Level change immediately after Medicaid expansion  | -7.36<br>(-16.43, 1.71)    | 0.24<br>(-0.19, 0.67)      | 0.00<br>(-0.12, 0.13)    | 0.24<br>(-0.09, 0.57)    |
| Change in quarterly trend after Medicaid expansion | 6.83***<br>(4.19, 9.48)    | 0.19**<br>(0.08, 0.30)     | 0.08***<br>(0.04, 0.12)  | 0.11**<br>(0.03, 0.19)   |
| <b>Hispanic birthing persons</b>                   |                            |                            |                          |                          |
| Quarterly trend before Medicaid expansion          | -0.26<br>(-2.18, 1.67)     | -0.06<br>(-0.15, 0.02)     | -0.02*<br>(-0.04, -0.00) | -0.04*<br>(-0.08, -0.01) |
| Level change immediately after Medicaid expansion  | -1.11<br>(-9.33, 7.10)     | 0.30<br>(-0.28, 0.87)      | 0.05<br>(-0.05, 0.15)    | 0.24*<br>(0.03, 0.46)    |
| Change in quarterly trend after Medicaid expansion | 6.99***<br>(4.54, 9.45)    | 0.04<br>(-0.11, 0.20)      | 0.04*<br>(0.01, 0.07)    | 0.01<br>(-0.08, 0.10)    |

Authors' analysis of the Arkansas All Payer Claims Database, 2013–15. Interrupted time series regression models adjusted for age, education, and race. Standard errors adjusted for autocorrelation. Quadratic term used to account for nonlinear trend in the outcome after the start of Medicaid expansion.

\*p < 0.05 \*\*p < 0.01 \*\*\*p < 0.001

eFigure 2: Mean number of non-ED outpatient visits in the first 60 days postpartum visits among persons with Medicaid and commercially financed childbirth, 2013-2015

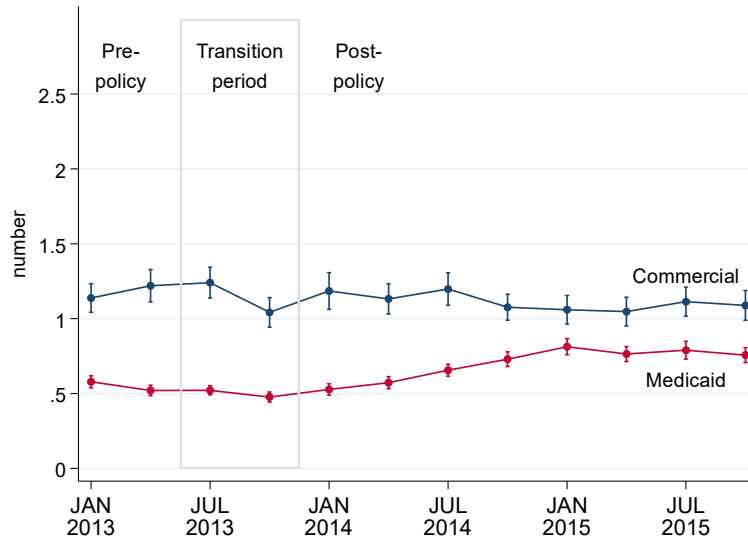

eFigure 3: Mean number of outpatient visits during the first six months postpartum among persons with Medicaid and commercially financed childbirth, 2013-2015

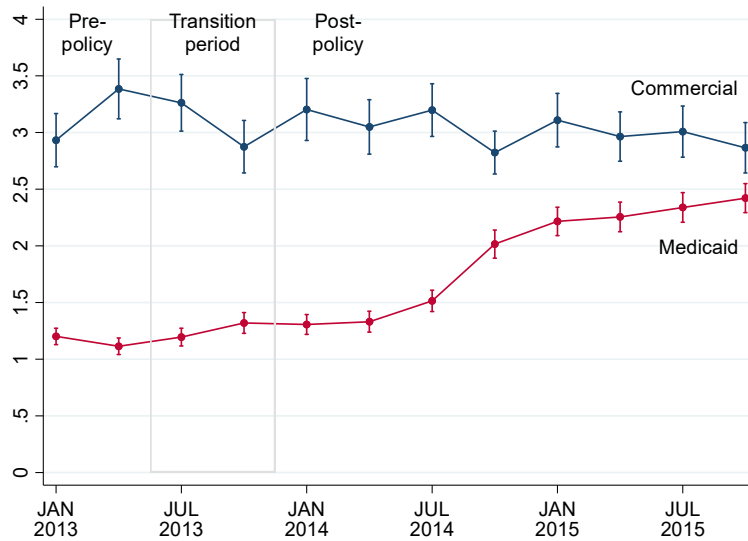



eFigure 4: Proportion of persons with Medicaid-covered childbirth who had six months of continuous insurance coverage after childbirth, by race/ethnicity, 2013-2015

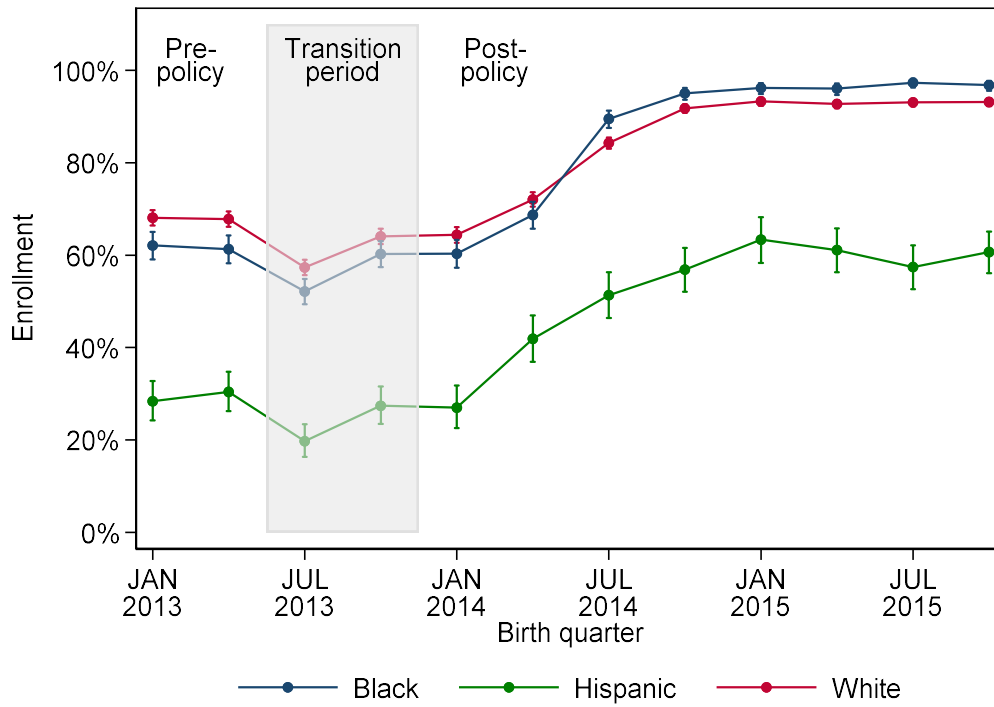

eFigure 5: Mean number of non-ED outpatient visits during the first 6 months postpartum among persons with Medicaid financed childbirth, by race/ethnicity, 2013-2015

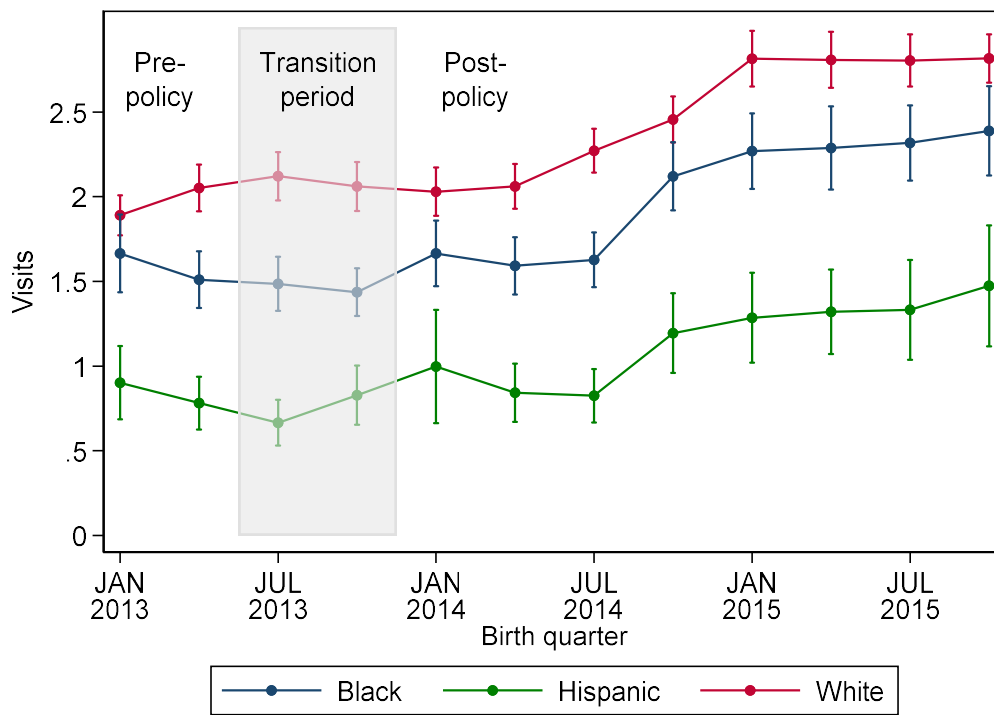

eTable 5: Racial disparities in continuous enrollment and number of outpatient visits during the first 6 months postpartum, 2013-2015

|                             | Pre-expansion<br>January-June 2013<br>Percent (95% CI) | Post-expansion<br>(2014/2015)<br>Percent (95% CI) |
|-----------------------------|--------------------------------------------------------|---------------------------------------------------|
| Continuous enrollment       |                                                        |                                                   |
| Black birthing people       | 62 (59.6, 63.8)                                        | 88 (87.2, 88.6)                                   |
| White birthing people       | 68 (66.8, 69.1)                                        | 86 (85.5,86.3)                                    |
| Number of outpatient visits |                                                        |                                                   |
| Black birthing people       | 1.6 (1.4, 1.7)                                         | 2.0 (2.0,2.1)                                     |
| White birthing people       | 2.0 (1.9,2.1 )                                         | 2.5 (2.5,2.6 )                                    |

## eReference

1. Kahn-Lang A, Lang K. The promise and pitfalls of differences-in-differences: Reflections on 16 and pregnant and other applications. *Journal of Business & Economic Statistics*. 2020;38(3):613-620.
